# Supplementary material for: Stable isotope labeling to study the nitrogen metabolism in microcystin biosynthesis
Source: Royal Society of Chemistry journal article supplement (doi:10.1039/c6ra03031a), 2016-01-01
Supplement: c6ra03031a1.pdf [file c6ra03031a1.pdf]

1

## Supplementary Information for

### 2 **Stable isotope labeling nitrogen metabolism in microcystin biosynthesis**

3

4

5 Zhen-Lian Han<sup>a, b, c, d</sup>, Xiao-Shuang Shi<sup>d</sup>, Yue-Tong Ji<sup>d</sup>, Xiao-Ming Tan<sup>d</sup>, Fa-Li Bai<sup>d</sup>,

6 Xian-Zheng Yuan<sup>a, d\*</sup>, Yi-Qian Wang<sup>c\*</sup>, Rong-Bo Guo<sup>d\*</sup>

7

8 a State Key Laboratory of Biological Fermentation Engineering of Beer, Tsingtao

9 Brewery Co., Ltd, Qingdao 266100, China

10 b College Material Science & Engineering, Qingdao University, Qingdao, Shandong

11 Province 266071, P. R. China

12 c Cultivation Base State Key Lab, Qingdao University, Qingdao, Shandong Province

13 266071, P. R. China

14 d Key Laboratory of Biofuels, Qingdao Institute of Bioenergy and Bioprocess

15 Technology, Chinese Academy of Sciences, Qingdao, Shandong Province 266101, P.

16 R. China

17

18 \* Corresponding Author:

19 Xian-Zheng YUAN; E-mail: yuanxz@qibebt.ac.cn; Tel./Fax:+86 532 80662750

20 Yi-Qian WANG; E-mail: yqwang@qdu.edu.cn; Tel./Fax:+86 532 83780318

21 Rong-Bo GUO; E-mail: guorb@qibebt.ac.cn; Tel./Fax: +86 532 80662750

22

23

1 List of Figures

2 **Fig. S1:** HPLC chromatograms of MC-LR and purified  $^{15}\text{N}$ -MC-LR

3 **Fig. S2:** MS/MS spectra of MC-LR standard ( $m/z=995.5$ )

4 **Fig. S3:** MS/MS spectra of  $^{15}\text{N}_1$ -MC ( $m/z=996.5$ )

5 **Fig. S4:** MS/MS spectra of  $^{15}\text{N}_2$ -MC ( $m/z=997.5$ )

6 **Fig. S5:** MS/MS spectra of  $^{15}\text{N}_3$ -MC ( $m/z=998.5$ )

7 **Fig. S6:** MS/MS spectra of  $^{15}\text{N}_4$ -MC ( $m/z=999.5$ )

8 **Fig. S7:** MS/MS spectra of  $^{15}\text{N}_5$ -MC ( $m/z=1000.5$ )

9 **Fig. S8:** MS/MS spectra of  $^{15}\text{N}_6$ -MC ( $m/z=1001.5$ )

10 **Fig. S9:** MS/MS spectra of  $^{15}\text{N}_7$ -MC ( $m/z=1002.5$ )

11 **Fig. S10:** MS/MS spectra of  $^{15}\text{N}_8$ -MC ( $m/z=1003.5$ )

12 **Fig. S11:** MS/MS spectra of  $^{15}\text{N}_9$ -MC ( $m/z=1004.5$ )

13 **Fig. S12:** MS/MS spectra of  $^{15}\text{N}_{10}$ -MC ( $m/z=1005.5$ )

14 **Fig. S13:** Growth curve of  $^{15}\text{N}$ -labeled MA and variants of ammonia in the  
15 cultivation of the 5<sup>th</sup> generation ■: MA, ▲: ammonia

16

17

18

19

20

21

22

1 List of Tables

2 Table S1: Components of BG11 medium

3 Table S2: Gradient elution of HPLC (A: % 5 acetonitrile containing containing 0.1%

4 formic acid B: acetonitrile containing 0.1% formic acid)

5 Table S3: Gradient elution of HPLC (A: 0.1% formic acid B: methanol)

6 Table S4: Major Raman spectral shifts in wavenumber shifts detected due to <sup>15</sup>N

7 incorporation

8 Table S5: MS-MS parent ion and daughter ions for m/z 996.5, 997.5, 998.5, 999.5,

9 1000.5, 1001.5, 1002.5, 1003.5, 1004.5 and 1005.5

10

11

1 **Table S1:** Components of BG11 medium

| Component                                            | Concentration(g/L) |
|------------------------------------------------------|--------------------|
| NaNO <sub>3</sub>                                    | 1.5                |
| K <sub>2</sub> HPO <sub>4</sub>                      | 0.04               |
| MgSO <sub>4</sub>                                    | 0.075              |
| CaCl <sub>2</sub> ·2H <sub>2</sub> O                 | 0.036              |
| Citric                                               | 0.006              |
| Ferric Citrate                                       | 0.006              |
| Na <sub>2</sub> -EDTA                                | 0.001              |
| Na <sub>2</sub> CO <sub>3</sub>                      | 0.02               |
| H <sub>3</sub> BO <sub>3</sub>                       | 0.00286            |
| MnCl <sub>2</sub> ·4H <sub>2</sub> O                 | 0.00181            |
| ZnSO <sub>4</sub> ·7H <sub>2</sub> O                 | 0.000222           |
| Na <sub>2</sub> MoO <sub>4</sub> ·2H <sub>2</sub> O  | 0.00039            |
| CuSO <sub>4</sub> ·5H <sub>2</sub> O                 | 0.000079           |
| Co(NO <sub>3</sub> ) <sub>2</sub> ·6H <sub>2</sub> O | 0.0000494          |

1 **Table S2:** Gradient elution of HPLC (A: %5 acetonitrile containing 0.1% formic acid

2 B: acetonitrile containing 0.1% formic acid)

| Retention time (min) | % A | % B |
|----------------------|-----|-----|
| 0                    | 70  | 30  |
| 20                   | 60  | 40  |
| 25                   | 10  | 90  |
| 28                   | 70  | 30  |
| 28.1                 | 70  | 30  |
| 35                   | 70  | 30  |

3

4

5

6

7

8

9

10

11

12

13

14

1 **Table S3:** Gradient elution of HPLC (A: 0.1% formic acid B: methanol)

| Retention time (min) | % A | % B |
|----------------------|-----|-----|
| 0                    | 99  | 1   |
| 5                    | 99  | 1   |
| 10                   | 85  | 15  |
| 20                   | 0   | 100 |
| 30                   | 0   | 100 |

2

3

4

5

6

7

8

9

10

11

12

13

14

15

1 **Table S4:** Major Raman spectral shifts in wavenumber shifts detected due to  $^{15}\text{N}$   
2 incorporation

| Unlabeled ( $\text{cm}^{-1}$ ) | $^{15}\text{N}$ ( $\Delta \text{cm}^{-1}$ ) | Assignment                                                                        |
|--------------------------------|---------------------------------------------|-----------------------------------------------------------------------------------|
| 1259                           | -10                                         | Amide III                                                                         |
| 1452                           | -12                                         | Arg N-C-N asymmetric stretch, Arg C-N-H side chain vibrations, Arg C-H vibrations |
| 1644                           | -24                                         | Amide I (C=O), water in aqueous peptide sample                                    |

3

4

5

6

7

8

9

10

11

1 **Table S5:** MS-MS parent ion and daughter ions for m/z 996.5, 997.5, 998.5, 999.5,  
 2 1000.5, 1001.5, 1002.5, 1003.5, 1004.5 and 1005.5

| Parent ions                       | Daughter ions | Identity                                                            |
|-----------------------------------|---------------|---------------------------------------------------------------------|
| 996.5<br>(M+H+1 <sup>15</sup> N)  | 600           | Arg-Adda-Glu+H+1 <sup>15</sup> N/MeAsp-Arg-Adda+H+1 <sup>15</sup> N |
|                                   | 470           | Ala-Leu-MeAsp-Arg+H                                                 |
|                                   | 553           | Mdha-Ala-Leu-MeAsp-Arg+H                                            |
|                                   | 711           | Adda-Glu-Mdha-Ala-Leu+H+1 <sup>15</sup> N                           |
|                                   | 865           | Mdha-Ala-Leu-MeAsp-Arg-Adda+H                                       |
|                                   | 867           | Arg-Adda-Glu-Mdha-Ala-Leu+H+1 <sup>15</sup>                         |
| 997.5<br>(M+H+2 <sup>15</sup> N)  | 600           | Arg-Adda-Glu+H+1 <sup>15</sup> N/MeAsp-Arg-Adda+H+1 <sup>15</sup> N |
|                                   | 471           | Ala-Leu-MeAsp-Arg+H+1 <sup>15</sup> N                               |
|                                   | 554           | Mdha-Ala-Leu-MeAsp-Arg+H+1 <sup>15</sup> N                          |
|                                   | 712           | Adda-Glu-Mdha-Ala-Leu+H+2 <sup>15</sup> N                           |
|                                   | 868           | Arg-Adda-Glu-Mdha-Ala-Leu+H+2 <sup>15</sup> N                       |
|                                   | 925           | Leu-MeAsp-Arg-Adda-Glu-Mdha+H+1 <sup>15</sup> N                     |
| 998.5<br>(M+H+3 <sup>15</sup> N)  | 601           | Arg-Adda-Glu+H+2 <sup>15</sup> N/MeAsp-Arg-Adda+H+2 <sup>15</sup> N |
|                                   | 472           | Ala-Leu-MeAsp-Arg+H+2 <sup>15</sup> N                               |
|                                   | 555           | Mdha-Ala-Leu-MeAsp-Arg+H+2 <sup>15</sup> N                          |
|                                   | 868           | Mdha-Ala-Leu-MeAsp-Arg-Adda+H+3 <sup>15</sup> N                     |
|                                   | 868           | Arg-Adda-Glu-Mdha-Ala-Leu+H+2 <sup>15</sup> N                       |
|                                   | 926           | Leu-MeAsp-Arg-Adda-Glu-Mdha+H+2 <sup>15</sup> N                     |
| 999.5<br>(M+H+4 <sup>15</sup> N)  | 602           | Arg-Adda-Glu+H+3 <sup>15</sup> N/MeAsp-Arg-Adda+H+3 <sup>15</sup> N |
|                                   | 473           | Ala-Leu-MeAsp-Arg+H+3 <sup>15</sup> N                               |
|                                   | 870           | Arg-Adda-Glu-Mdha-Ala-Leu+H+4 <sup>15</sup> N                       |
| 1000.5<br>(M+H+5 <sup>15</sup> N) | 602           | Arg-Adda-Glu+H+3 <sup>15</sup> N/MeAsp-Arg-Adda+H+3 <sup>15</sup> N |
|                                   | 473           | Ala-Leu-MeAsp-Arg+H+3 <sup>15</sup> N                               |
|                                   | 557           | Mdha-Ala-Leu-MeAsp-Arg+H+4 <sup>15</sup> N                          |
|                                   | 870           | Arg-Adda-Glu-Mdha-Ala-Leu+H+4 <sup>15</sup> N                       |
|                                   | 928           | Leu-MeAsp-Arg-Adda-Glu-Mdha+H+4 <sup>15</sup> N                     |
| 1001.5<br>(M+H+6 <sup>15</sup> N) | 602           | Arg-Adda-Glu+H+3 <sup>15</sup> N/MeAsp-Arg-Adda+H+3 <sup>15</sup> N |
|                                   | 474           | Ala-Leu-MeAsp-Arg+H+4 <sup>15</sup> N                               |
|                                   | 558           | Mdha-Ala-Leu-MeAsp-Arg+H+5 <sup>15</sup> N                          |
|                                   | 714           | Adda-Glu-Mdha-Ala-Leu+H+4 <sup>15</sup> N                           |
|                                   | 871           | Mdha-Ala-Leu-MeAsp-Arg-Adda+H+6 <sup>15</sup> N                     |



---

|                                    |     |                                                                     |
|------------------------------------|-----|---------------------------------------------------------------------|
|                                    | 929 | Leu-MeAsp-Arg-Adda-Glu-Mdha+H+5 <sup>15</sup> N                     |
| 1002.5<br>(M+H+7 <sup>15</sup> N)  | 603 | Arg-Adda-Glu+H+4 <sup>15</sup> N/MeAsp-Arg-Adda+H+4 <sup>15</sup> N |
|                                    | 474 | Ala-Leu-MeAsp-Arg+H+4 <sup>15</sup> N                               |
|                                    | 558 | Mdha-Ala-Leu-MeAsp-Arg+H+5 <sup>15</sup> N                          |
|                                    | 872 | Mdha-Ala-Leu-MeAsp-Arg-Adda+H+7 <sup>15</sup> N                     |
|                                    | 930 | Leu-MeAsp-Arg-Adda-Glu-Mdha+H+6 <sup>15</sup> N                     |
| 1003.5<br>(M+H+8 <sup>15</sup> N)  | 604 | Arg-Adda-Glu+H+5 <sup>15</sup> N/MeAsp-Arg-Adda+H+5 <sup>15</sup> N |
|                                    | 475 | Ala-Leu-MeAsp-Arg+H+5 <sup>15</sup> N                               |
|                                    | 559 | Mdha-Ala-Leu-MeAsp-Arg+H+6 <sup>15</sup> N                          |
| 1004.5<br>(M+H+9 <sup>15</sup> N)  | 560 | Mdha-Ala-Leu-MeAsp-Arg+H+7 <sup>15</sup> N                          |
|                                    | 476 | Ala-Leu-MeAsp-Arg+H+6 <sup>15</sup> N                               |
|                                    | 932 | Leu-MeAsp-Arg-Adda-Glu-Mdha+H+8 <sup>15</sup> N                     |
| 1005.5<br>(M+H+10 <sup>15</sup> N) | 561 | Mdha-Ala-Leu-MeAsp-Arg+H+8 <sup>15</sup> N                          |
|                                    | 605 | Arg-Adda-Glu+H+6 <sup>15</sup> N/MeAsp-Arg-Adda+H+6 <sup>15</sup> N |
|                                    | 477 | Ala-Leu-MeAsp-Arg+H+7 <sup>15</sup> N                               |
|                                    | 875 | Mdha-Ala-Leu-MeAsp-Arg-Adda+H+10 <sup>15</sup> N                    |

---

1

2

3

4

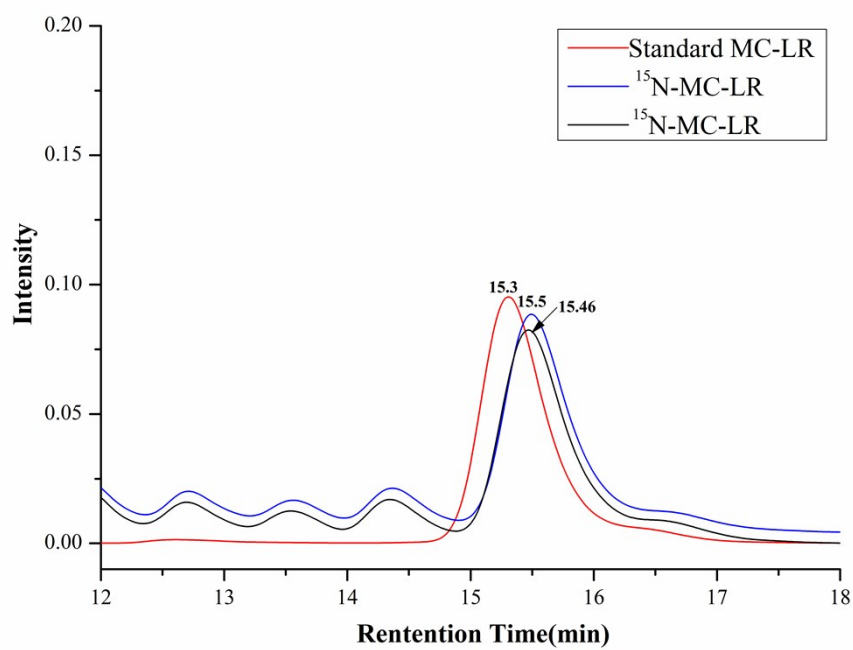

1

2

**Fig.S1:** HPLC chromatograms of MC-LR and purified <sup>15</sup>N-MC-LR

LR-STD-995MS2-20130330 #294 RT: 3.79 AV: 1 NL: 7.25E1  
T: ITMS + c ESI Full ms2 995.50@cid35.00 [270.00-1000.00]

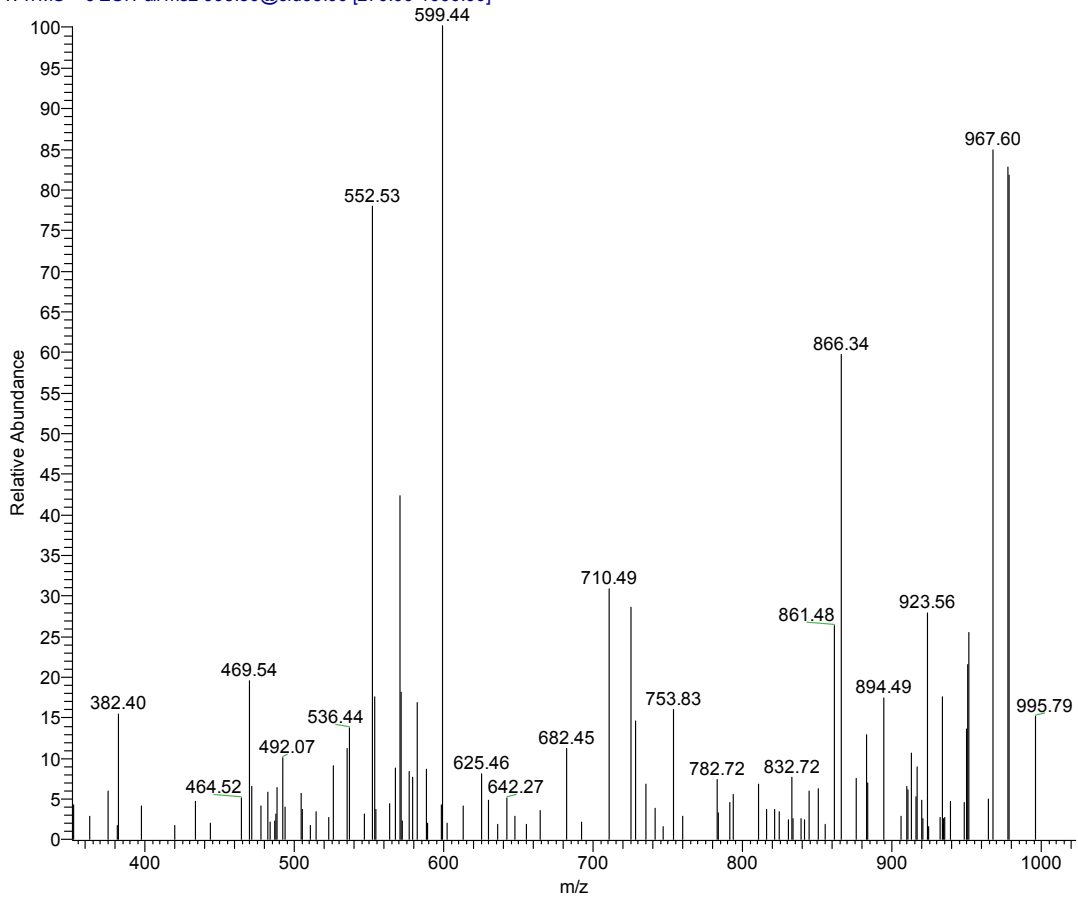

1

2

**Fig. S2:** MS/MS spectra of MC-LR standard (m/z=995.5)

1

15N-1 #260 RT: 3.82 AV: 1 NL: 1.93E3  
F: ITMS + c ESI Full ms2 996.50@cid30.00 [270.00-1100.00]

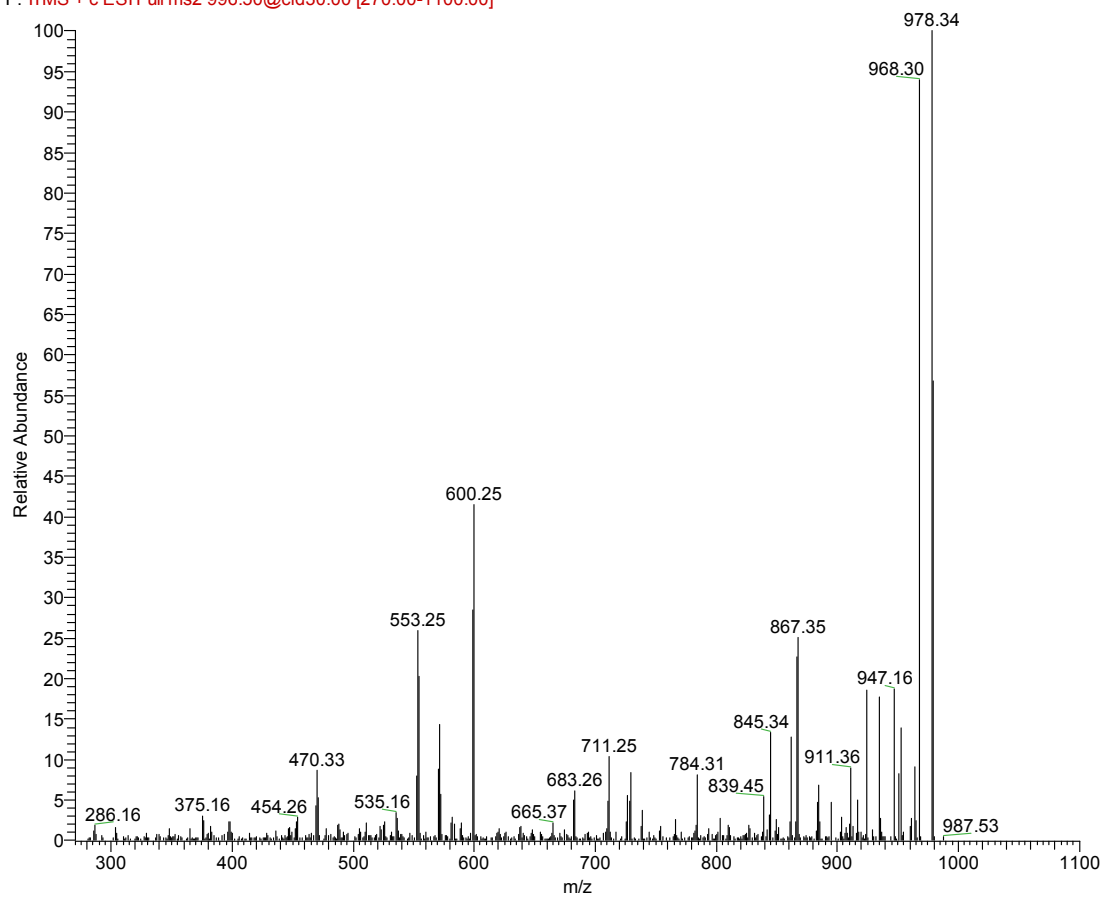

2

3

**Fig. S3:** MS/MS spectra of  $^{15}\text{N}_1\text{-MC}$  ( $m/z=996.5$ )

15N-1 #261 RT: 3.84 AV: 1 NL: 9.74E2  
F: ITMS + c.ESI Full ms2 997.50@cid30.00 [270.00-1100.00]

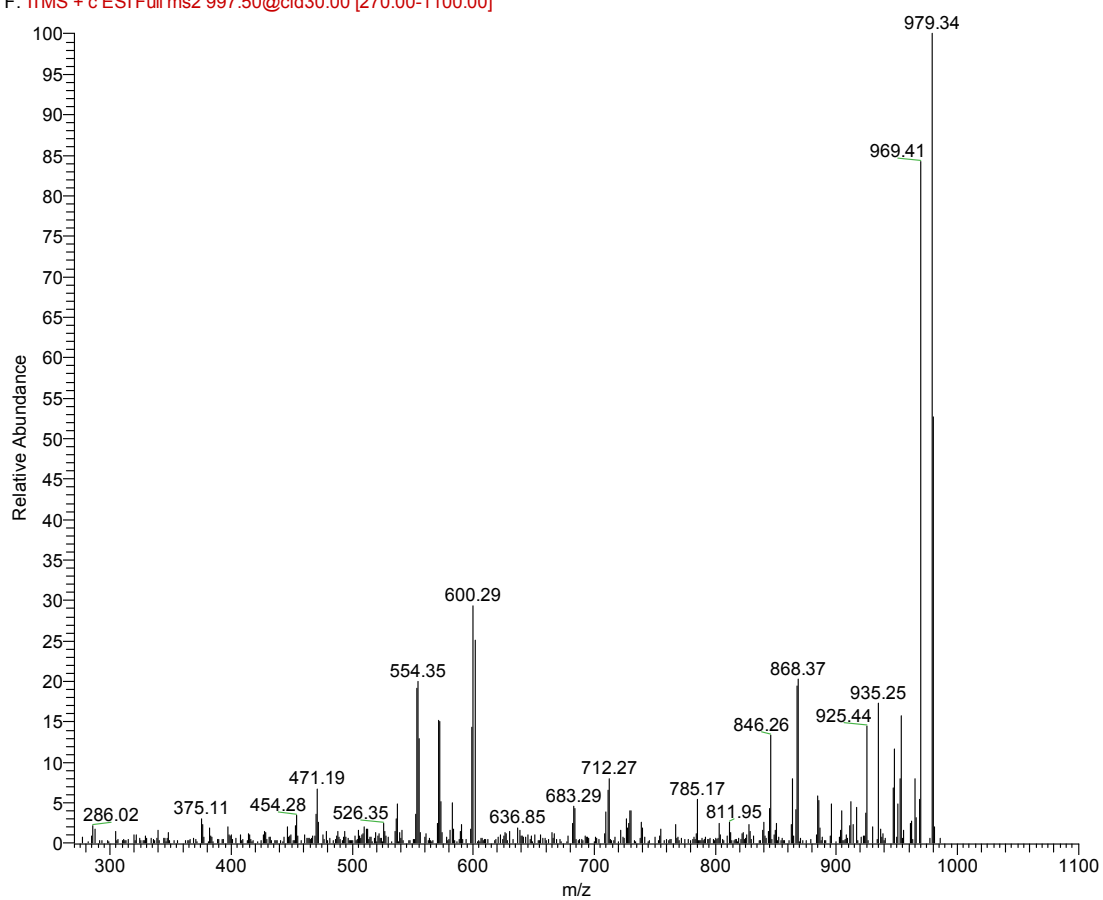

1

2

**Fig. S4:** MS/MS spectra of  $^{15}\text{N}_2\text{-MC}$  ( $m/z=997.5$ )

15N-1 #262 RT: 3.86 AV: 1 NL: 4.94E2  
F: ITMS + c.ESI Full ms2 998.50@cid30.00 [270.00-1100.00]

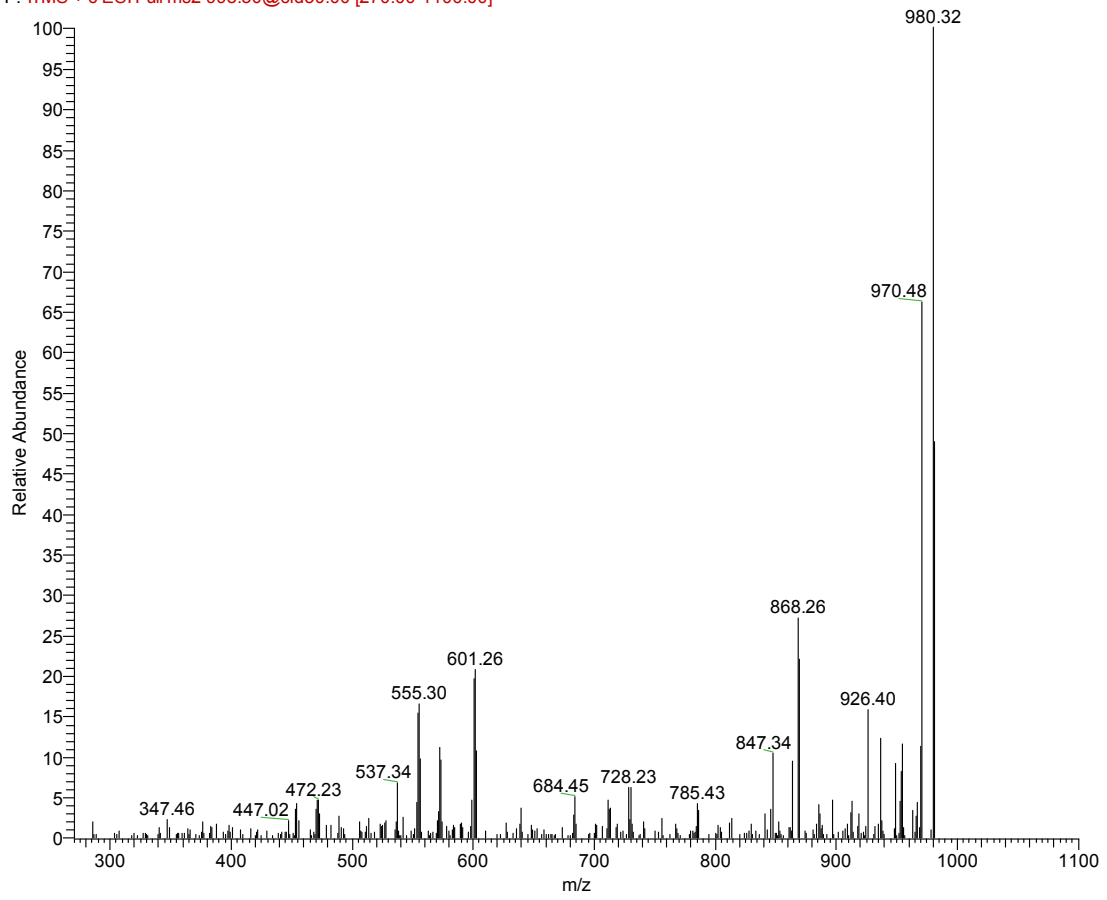

1

2

**Fig. S5:** MS/MS spectra of  $^{15}\text{N}_3\text{-MC}$  ( $m/z=998.5$ )

15N-1 #257 RT: 3.78 AV: 1 NL: 4.43E2  
F: ITMS + c.ESI Full ms2 999.50@cid30.00 [275.00-1100.00]

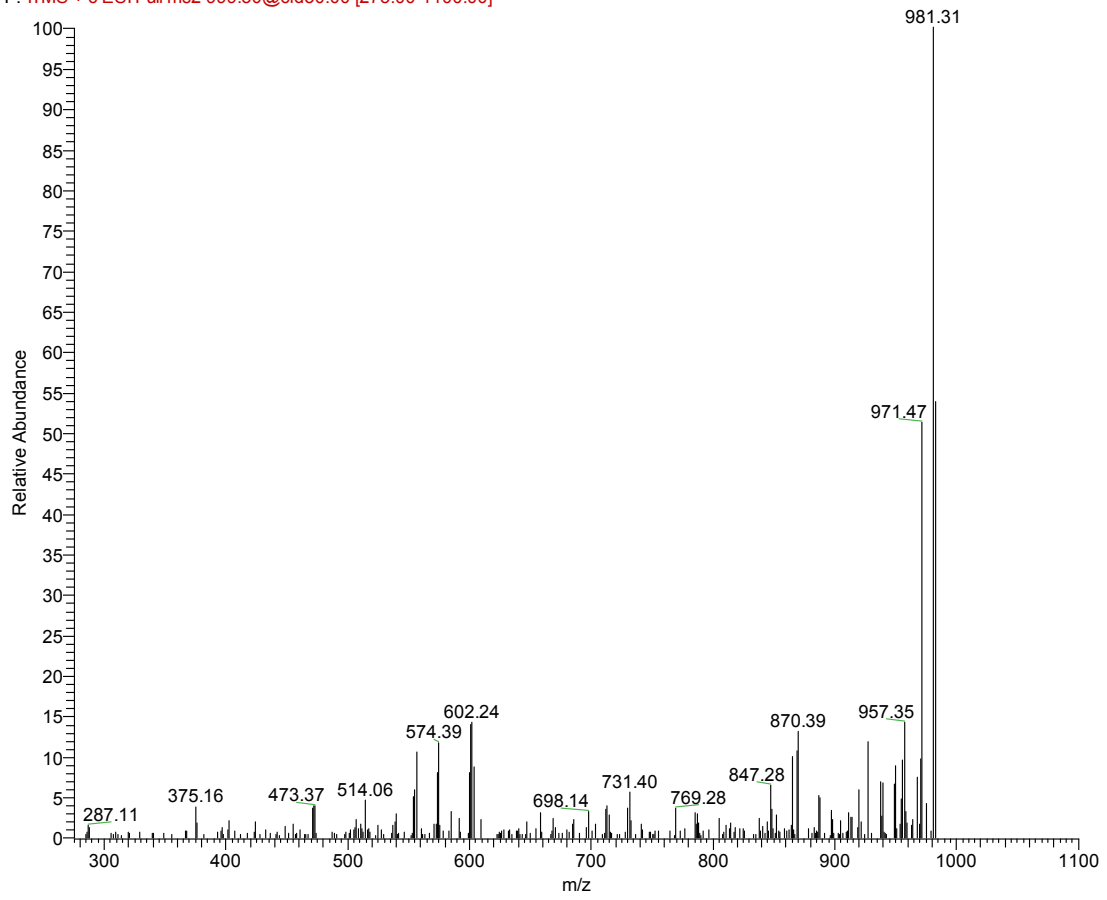

1

2

**Fig. S6:** MS/MS spectra of  $^{15}\text{N}_4\text{-MC}$  ( $m/z=999.5$ )

15N-1 #258 RT: 3.80 AV: 1 NL: 5.74E2  
F: ITMS + c.ESI Full ms2 1000.50@cid30.00 [275.00-1100.00]

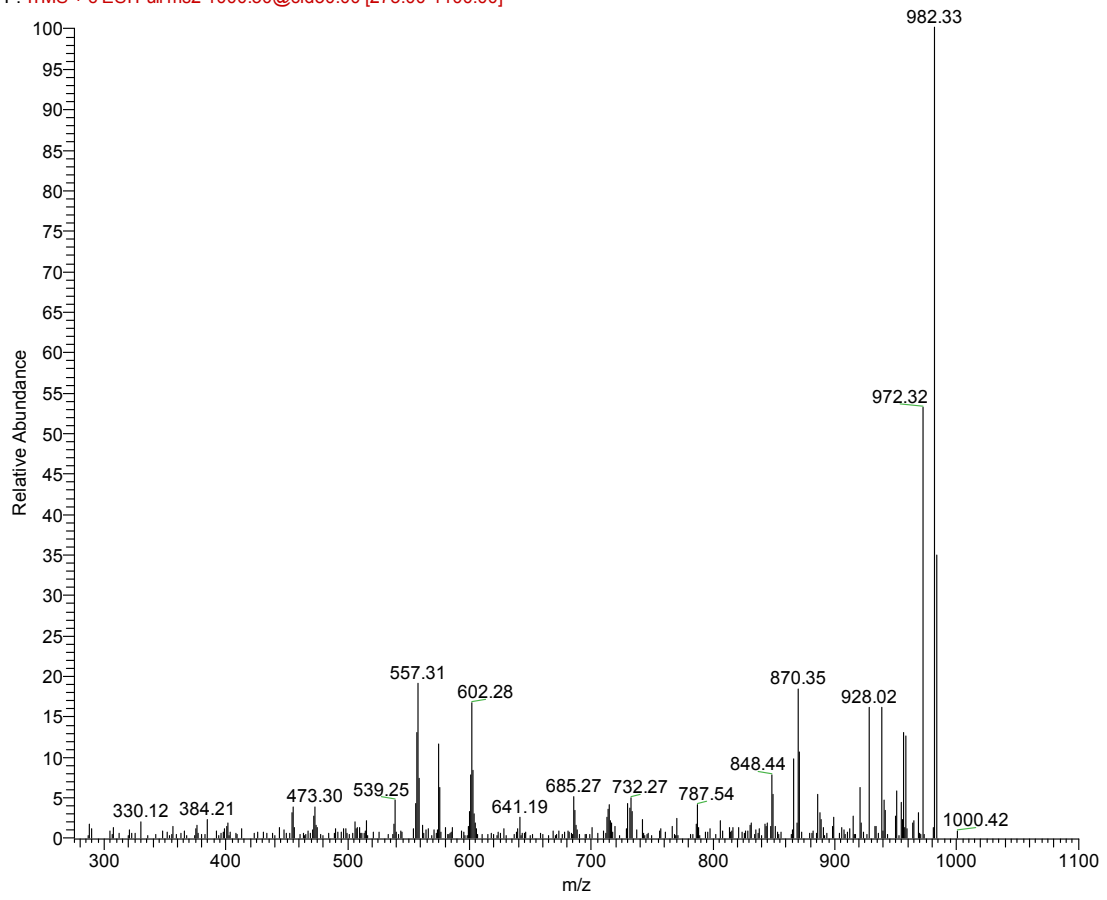

1

2

**Fig. S7:** MS/MS spectra of  $^{15}\text{N}_5\text{-MC}$  ( $m/z=1000.5$ )



15N-2 #258 RT: 3.84 AV: 1 NL: 1.02E3  
F: ITMS + c.ESI Full ms2 1001.40@cid30.00 [275.00-1100.00]

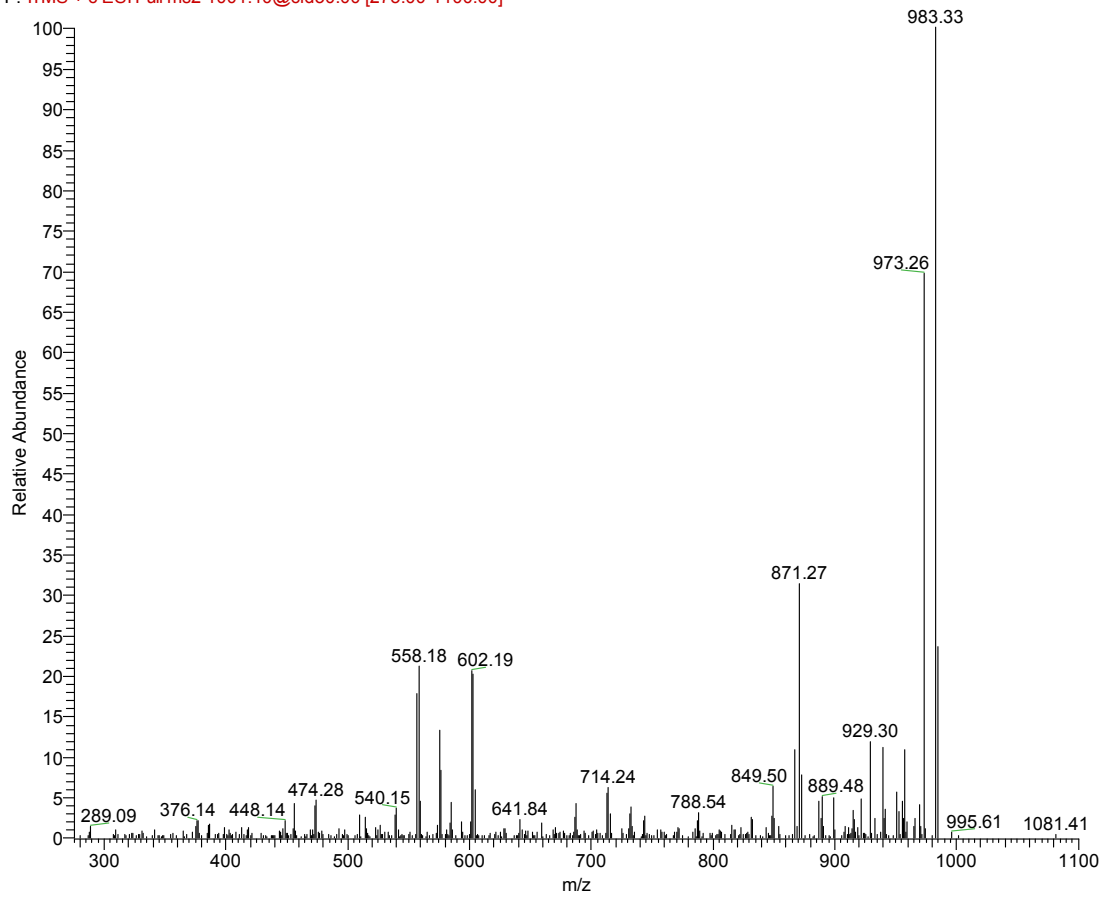

1

2

**Fig. S8:** MS/MS spectra of  $^{15}\text{N}_6\text{-MC}$  ( $m/z=1001.5$ )

15N-2 #259 RT: 3.86 AV: 1 NL: 2.06E3  
F: ITMS + c.ESI Full ms2 1002.40@cid30.00 [275.00-1100.00]

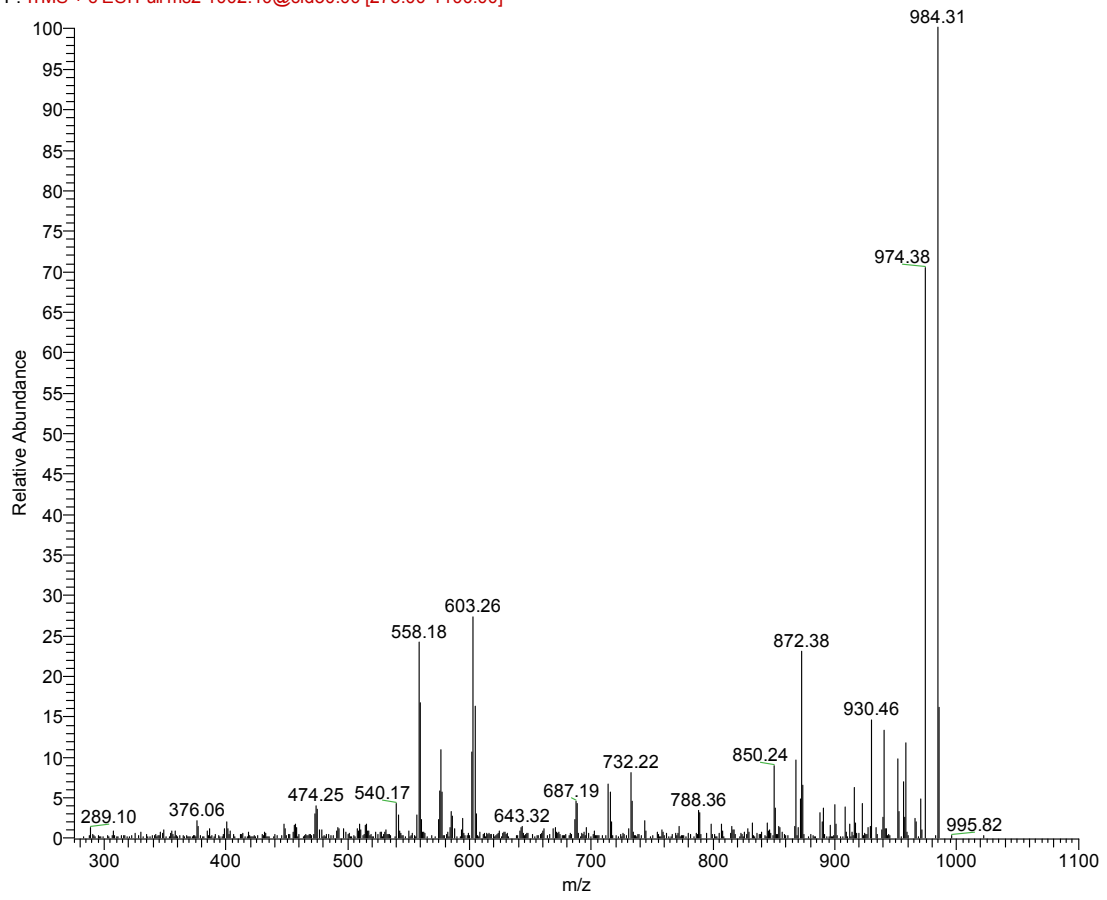

1

2

**Fig. S9:** MS/MS spectra of  $^{15}\text{N}_7\text{-MC}$  ( $m/z=1002.5$ )

3

4

15N-2 #260 RT: 3.88 AV: 1 NL: 3.74E3  
F: ITMS + c.ESI Full ms2 1003.40@cid30.00 [275.00-1100.00]

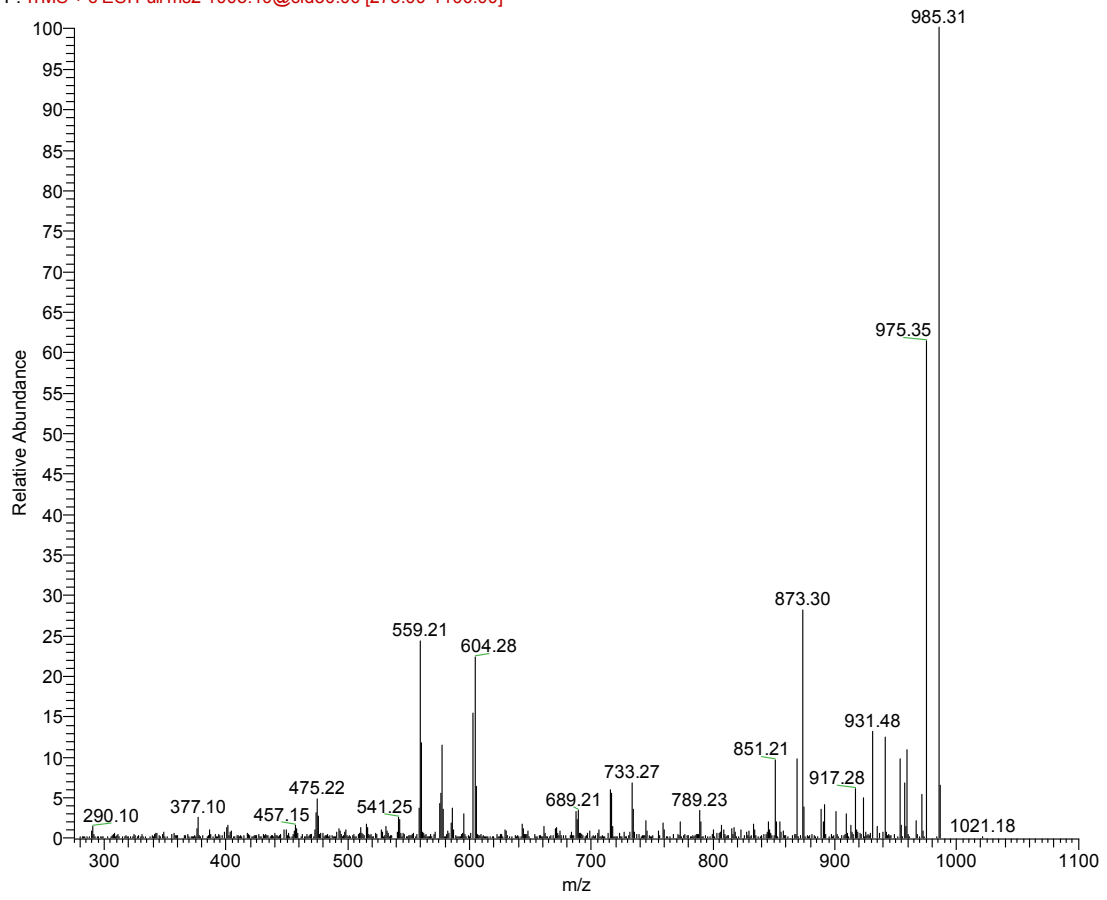

1

2

**Fig. S10:** MS/MS spectra of  $^{15}\text{N}_8\text{-MC}$  ( $m/z=1003.5$ )

15N-2 #253 RT: 3.78 AV: 1 NL: 6.33E3  
F: ITMS + c ESI Full ms2 1004.40@cid30.00 [275.00-1100.00]

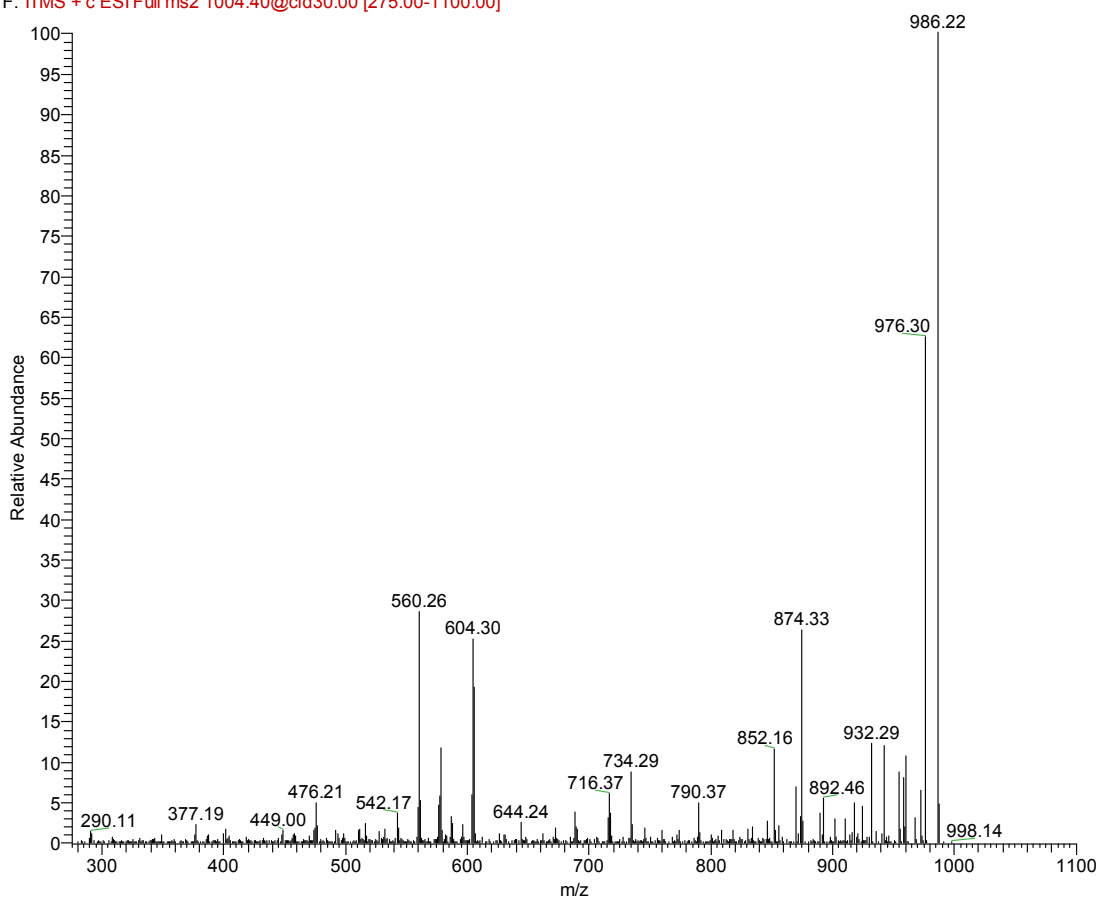

1

2

**Fig. S11:** MS/MS spectra of  $^{15}\text{N}_9\text{-MC}$  ( $m/z=1004.5$ )

3

15N-2 #254 RT: 3.79 AV: 1 NL: 1.01E4  
F: ITMS + c.ESI Full ms2 1005.40@cid30.00 [275.00-1100.00]

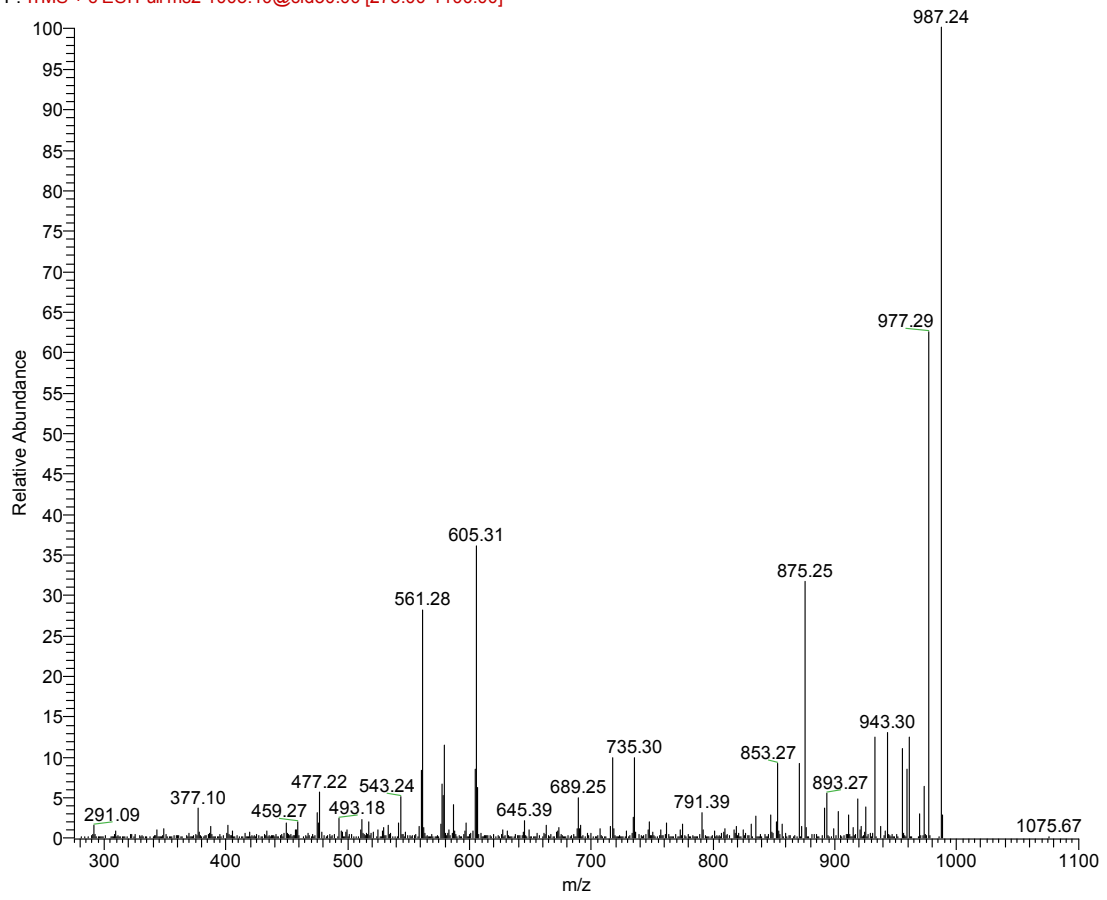

1

2

**Fig. S12:** MS/MS spectra of  $^{15}\text{N}_{10}$ -MC ( $m/z=1005.5$ )

3

4

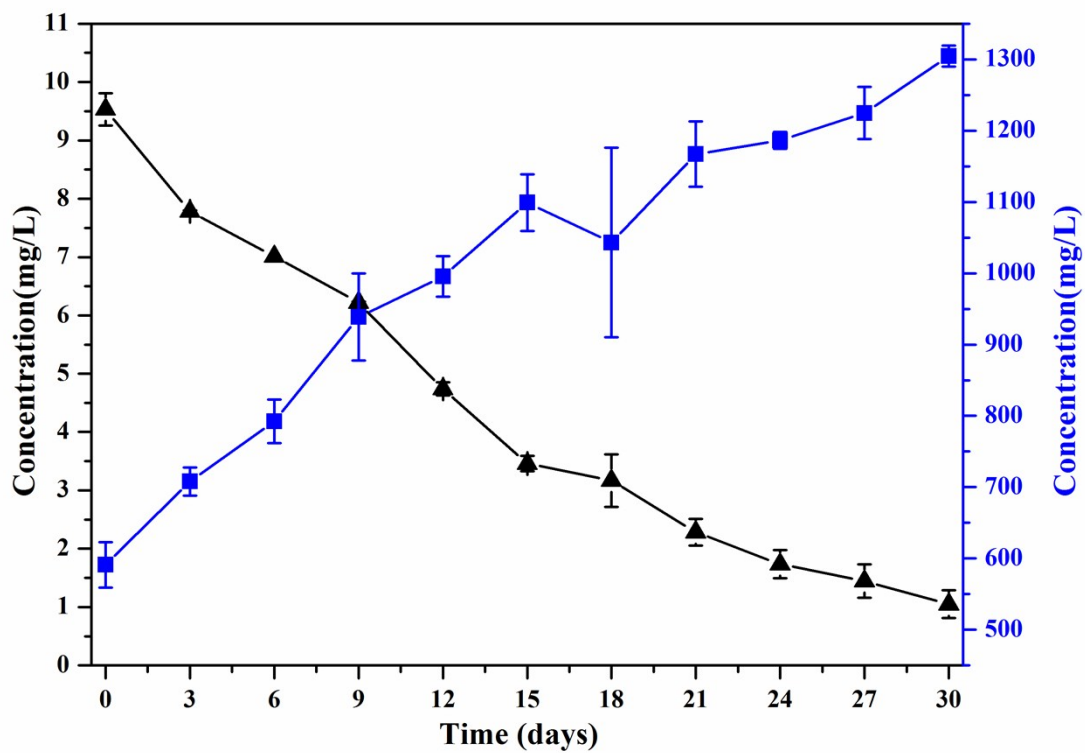

1

2

**Fig. S13:** Growth curve of  $^{15}\text{N}$ -labeled MA and variants of ammonia in the

3

cultivation of the 5<sup>th</sup> generation ■: MA, ▲: ammonia

4
